# Supplementary material
Source: Research Square preprint supplement (doi:10.21203/rs.3.rs-9030226/v1)
Supplement: Supplementary file 1 [file 9296c1270074a5839ab6c30b.docx]

**> The sequence of the cloned cDNA-derived IbGGPPS2 CDS (stop codon removed)**

TACTTACCTAGCATCTGAATTTCATAACCAATCTCGATACACCAAATCGACTCTAGAAAGCTTCTGCAGGGGCCCGGGGTCGACATGAGTCTTGCAAATCCTAGCACAACTTGGGCAAAGACCCATTCTTTTTGCGGCAGATTCAGATCCGGGTCTCTCATAAAAAGCAATGAATTCCGCATAAATCTCTCGTTCCCGAGCTCAATCAGGAAAAAACCGCTGTTTCATTCTTGCTCCGCGATTCTCACCAAGGAGCAGACCGATGTTCCCCAGGGAGAAAGCGAGAACAAGCTTGATTTCAAGGCGTATGTGTTGGGGAAGGCGGAATCGGTGAACAAGGCGTTAGAAGCGGCGGTGTTGCTGAAGGAGCCGTTGAGGGTTCACGAATCGATGAGGTATTCTCTCCTCGCCGGCGGGAAGAGGATCCGGCCAATGCTATGTATCGCCGCCTGCGAGCTCGTCGGCGGGGATGAGGCCACCGCCATGCCGGCGGCCTGCGCGGTGGAGATGATTCACACCATGTCTCTGATGCACGACGACCTCCCGTGTATGGACAACGACGATTTGCGGCGAGGGAAGCCGACGAACCACAAGGTTTTCGGGGAAAACGTGGCGGTTCTCGCCGGGGACGCCTTGCTTTCATTCGCCTTTGAGCATATAGCCACCGCCACAAAAGGGGTTTCCTCGGAGAAGATAGTGAGGGTAATTGGGGAATTGGCTAAGTGCATTGGGGCTGAGGGGCTCGTGGCTGGGCAGGTAGTGGATATATGCTCAGAGGGGATCTCCGATGTGGGATTAGAACATTTAGAGTTCATTCATCTCCACAAAACCGCAGCTTTGCTGGAGGCTTCTGTGGTTCTGGGAGCGGTTCTGGGTGGGGGAACTGAGGAAGAGGTTGCTAAATTAAGGAAATTCGCCCGAAACATCGGGCTGTTGTTTCAGGTTGTTGATGACATTCTTGATGTCACCAAATCCTCCCATGAATTGGGGAAGACAGCTGGGAAGGATTTGGTTGCTGACAAGGTGACTTATCCTAAGCTGCTTGGGCTTCAGAAGTCCAGAGAGTTTGCTGAGCAGCTGAACAAAGAGTCTCAGGCTCAGCTCTCTGGCTTTGATCAAGGCAAGGCTGCCCCGTTGATCGCCTTGGCCAATTACATTGCTTACCGGGAGAACCGTCGACATTTAAATACTAGTGGATCCGGTACCATGGTGAGCAAGGGCGAGGAGCGTCACCGGGGTT

Blue: vector-derived sequence (from the 35S-driven overexpression vector pCAMBIA1300-GFP)

**> The CDS of IbGGPPS2 from the Sweetpotato Genomics Resource (https://sweetpotato.uga.edu/) database**

ATGAGTCTTGCAAATCCTAGCACAACTTGGGCAAAGACCCATTCTTTTTGCGGCAGATTCAGATCCGGGTCTCTCATAAAAAGCAATGAATTCCGCATAAATCTCTCGTTCCCGAGCTCAATCAGGAAAAAACCGCTGTTTCATTCTTGCTCCGCGATTCTCACCAAGGAGCAGACCGATGTTCCCCAGGGAGAAAGCGAGAACAAGCTTGATTTCAAGGCGTATGTGTTGGGGAAGGCGGAATCGGTGAACAAGGCGTTAGAAGCGGCGGTGTTGCTGAAGGAGCCGTTGAGGGTTCACGAATCGATGAGGTATTCTCTCCTCGCCGGCGGGAAGAGGATCCGGCCAATGCTATGTATCGCCGCCTGCGAGCTCGTCGGCGGGGATGAGGCCACCGCCATGCCGGCGGCCTGCGCGGTGGAGATGATTCACACCATGTCTCTGATGCACGACGACCTCCCGTGTATGGACAACGACGATTTGCGGCGAGGGAAGCCGACGAACCACAAGGTTTTCGGGGAAAACGTGGCGGTTCTCGCCGGGGACGCCTTGCTTTCATTCGCCTTTGAGCATATAGCCACCGCCACAAAAGGGGTTTCCTCGGAGAAGATAGTGAGGGTAATTGGGGAATTGGCTAAGTGCATTGGGGCTGAGGGGCTCGTGGCTGGGCAGGTAGTGGATATATGCTCAGAGGGGATCTCCGATGTGGGATTAGAACATTTAGAGTTCATTCATCTCCACAAAACCGCAGCTTTGCTGGAGGCTTCTGTGGTTCTGGGAGCGGTTCTGGGTGGGGGAACTGAGGAAGAGGTTGCTAAATTAAGGAAATTCGCCCGAAACATCGGGCTGTTGTTTCAGGTTGTTGATGACATTCTTGATGTCACCAAATCCTCCCATGAATTGGGGAAGACAGCTGGGAAGGATTTGGTTGCTGACAAGGTGACTTATCCTAAGCTGCTTGGGCTTCAGAAGTCCAGAGAGTTTGCTGAGCAGCTGAACAAAGAGTCTCAGGCTCAGCTCTCTGGCTTTGATCAAGGCAAGGCTGCCCCGTTGATCGCCTTGGCCAATTACATTGCTTACCGGGAGAACTGA

**> The DNA of IbGGPPS2 from the Sweetpotato Genomics Resource database**

ATGAGTCTTGCAAATCCTAGCACAACTTGGGCAAAGACCCATTCTTTTTGCGGCAGATTCAGATCCGGGTCTCTCATAAAAAGCAATGAATTCCGCATAAATCTCTCGTTCCCGAGCTCAATCAGGAAAAAACCGCTGTTTCATTCTTGCTCCGCGATTCTCACCAAGGAGCAGACCGATGTTCCCCAGGGAGAAAGCGAGAACAAGCTTGATTTCAAGGCGTATGTGTTGGGGAAGGCGGAATCGGTGAACAAGGCGTTAGAAGCGGCGGTGTTGCTGAAGGAGCCGTTGAGGGTTCACGAATCGATGAGGTATTCTCTCCTCGCCGGCGGGAAGAGGATCCGGCCAATGCTATGTATCGCCGCCTGCGAGCTCGTCGGCGGGGATGAGGCCACCGCCATGCCGGCGGCCTGCGCGGTGGAGATGATTCACACCATGTCTCTGATGCACGACGACCTCCCGTGTATGGACAACGACGATTTGCGGCGAGGGAAGCCGACGAACCACAAGGTTTTCGGGGAAAACGTGGCGGTTCTCGCCGGGGACGCCTTGCTTTCATTCGCCTTTGAGCATATAGCCACCGCCACAAAAGGGGTTTCCTCGGAGAAGATAGTGAGGGTAATTGGGGAATTGGCTAAGTGCATTGGGGCTGAGGGGCTCGTGGCTGGGCAGGTAGTGGATATATGCTCAGAGGGGATCTCCGATGTGGGATTAGAACATTTAGAGTTCATTCATCTCCACAAAACCGCAGCTTTGCTGGAGGCTTCTGTGGTTCTGGGAGCGGTTCTGGGTGGGGGAACTGAGGAAGAGGTTGCTAAATTAAGGAAATTCGCCCGAAACATCGGGCTGTTGTTTCAGGTTGTTGATGACATTCTTGATGTCACCAAATCCTCCCATGAATTGGGGAAGACAGCTGGGAAGGATTTGGTTGCTGACAAGGTGACTTATCCTAAGCTGCTTGGGCTTCAGAAGTCCAGAGAGTTTGCTGAGCAGCTGAACAAAGAGTCTCAGGCTCAGCTCTCTGGCTTTGATCAAGGCAAGGCTGCCCCGTTGATCGCCTTGGCCAATTACATTGCTTACCGGGAGAACTGA

**> The mRNA of IbGGPPS2 from the Sweetpotato Genomics Resource database**

GAAATTAATCATTGTATTATTTCCAGAAAGAAAACAAAACAAATAAATAAATAAATAAATAAATAAAACCCAAAAACTCAAAAAGTGGAGGAACCAATGAAGCTCATGACCATATCTCAAATGTATATATATCCTCCAACATGGGATATTCCACCAATCCTACCATTGATTCACTCCAGTGAACATTCAAATTTCCTGCCATTAATCCTAAATAAACTTTTGCCTTTTTTTTTTTTTGAGTGATAAAAGAAATGTTAGGTCTCCACTCTTCCAATTCCAAGTGACGTCTGTTGAATGCTCTGAGAGTTCTCAAAAGAAATCTCCGAACTGCATTTTCGTTCACAGAGGGGAAAGAATCAAAGAATGAGTCTTGCAAATCCTAGCACAACTTGGGCAAAGACCCATTCTTTTTGCGGCAGATTCAGATCCGGGTCTCTCATAAAAAGCAATGAATTCCGCATAAATCTCTCGTTCCCGAGCTCAATCAGGAAAAAACCGCTGTTTCATTCTTGCTCCGCGATTCTCACCAAGGAGCAGACCGATGTTCCCCAGGGAGAAAGCGAGAACAAGCTTGATTTCAAGGCGTATGTGTTGGGGAAGGCGGAATCGGTGAACAAGGCGTTAGAAGCGGCGGTGTTGCTGAAGGAGCCGTTGAGGGTTCACGAATCGATGAGGTATTCTCTCCTCGCCGGCGGGAAGAGGATCCGGCCAATGCTATGTATCGCCGCCTGCGAGCTCGTCGGCGGGGATGAGGCCACCGCCATGCCGGCGGCCTGCGCGGTGGAGATGATTCACACCATGTCTCTGATGCACGACGACCTCCCGTGTATGGACAACGACGATTTGCGGCGAGGGAAGCCGACGAACCACAAGGTTTTCGGGGAAAACGTGGCGGTTCTCGCCGGGGACGCCTTGCTTTCATTCGCCTTTGAGCATATAGCCACCGCCACAAAAGGGGTTTCCTCGGAGAAGATAGTGAGGGTAATTGGGGAATTGGCTAAGTGCATTGGGGCTGAGGGGCTCGTGGCTGGGCAGGTAGTGGATATATGCTCAGAGGGGATCTCCGATGTGGGATTAGAACATTTAGAGTTCATTCATCTCCACAAAACCGCAGCTTTGCTGGAGGCTTCTGTGGTTCTGGGAGCGGTTCTGGGTGGGGGAACTGAGGAAGAGGTTGCTAAATTAAGGAAATTCGCCCGAAACATCGGGCTGTTGTTTCAGGTTGTTGATGACATTCTTGATGTCACCAAATCCTCCCATGAATTGGGGAAGACAGCTGGGAAGGATTTGGTTGCTGACAAGGTGACTTATCCTAAGCTGCTTGGGCTTCAGAAGTCCAGAGAGTTTGCTGAGCAGCTGAACAAAGAGTCTCAGGCTCAGCTCTCTGGCTTTGATCAAGGCAAGGCTGCCCCGTTGATCGCCTTGGCCAATTACATTGCTTACCGGGAGAACTGATTCCTAGTGAGTGACTCGATTCTGCCATTTGATATATGATGATGCCTGTGGATGGCTCTCTCTTGTGCATTACAAAATCGATAGAGTTAGTCTTAAGATTTGACTATGTAATGAAATGATTGCTGAAAAACTGCCATTGTTCAATGATTATCCTTCGGTTTTCAAGAATCGCTATTTCCTTATTTCGTTTTGATGCTCAATTATTCTCCGGCCAAGTGTTTTCTGCTCGCCTAGTAGACGATAAATCATTCAAGAACTTTAAACTATTTGTGTAGTTCCAGAGTCAGTGTTAGTGGAATCATAACTTTCATCGTGTAGGTACCTTGTGTGCACACGTTTATTCCATTTCTTTTTACAGGTTCAAGTAATGCTGGTAGGGTCATATGTCACCTTCTATTGTTGTTTGAATTGCTTGTACAATATAATATATTTGCTTCATTGCGTGTTGTGTTGGCAGGTCATATTATTGGGTGTCTAAGATAAATTATTATGTATACTATGATGTGTTGATCCAATTTTAAACACTTTTAGCGTGTGGAAATTTGTTGGTTTATATTACTTCAGATAAGTGGGAAGATGCAGCTTGGAAGTAAGGTAATATCTTACACTCTTACACTTACAAGGCAGCAAGAGCCAATTGTTAGTATCTGTGGTTTTACGAGTCAACGTTTTATTATTAAAACGATTCTTGTGTGTAGAGTGTTGGAACTTGCAGGCATGTTTTACGGTACTTACTGCATGAACTAGTAATGCGTGTTTCTTGTGAAATTTCGTACTGCTGAGACTTGGAAACAGAAATTATATGTCACCGAACAATATGTAGGTACTTTTAGCAGGTTAACCTTCGTAGCTCTGGAGATACGTCCTCTTGAAATCCCAATTCAGCCCGGGAAGTGTAGTTCCGGGATAGGATTCCTCCAAATAGAAACAGGCATGGTATGGAGATGATGCCCGTAGATGAAATTGAATAGCGGGTGAACCATAGGTAGTTTTAAGTACGGGTCGTTTGGAAGGTTCCATAAGTTGAAACGCCCCTCACAGACGGGTGCATAGAGTAGAAGCTAGCTGAACTTGAGCAACAAAAACGAAGTTCTAGAAAAAGAGAAACACTCCGAGATATCAGTGGTTTTGCAGTGTTATTAGGTATGGTTAAGATGAAATACTGGTTGAAGGTTCTTCTGCTTTTACTAGGTTTCAGATTCTCAGACATAAAAACAATGTTTTGGGTTGTGGATGACAATGTTTAGCAGACACAAAAAAGTGTGGCTTTGCAGTGTTATTATGTATGATTAAGATGAAATACTGGTTGAAGTTTCTTCACAATACCCTGAGGTAAAAACAACATCAGAAACAAATTAAAAAAAAAAAAAAAAAAAAAAAAAA

**> The amino acid sequence of IbGGPPS2 from the Sweetpotato Genomics Resource database**

MSLANPSTTWAKTHSFCGRFRSGSLIKSNEFRINLSFPSSIRKKPLFHSCSAILTKEQTDVPQGESENKLDFKAYVLGKAESVNKALEAAVLLKEPLRVHESMRYSLLAGGKRIRPMLCIAACELVGGDEATAMPAACAVEMIHTMSLMHDDLPCMDNDDLRRGKPTNHKVFGENVAVLAGDALLSFAFEHIATATKGVSSEKIVRVIGELAKCIGAEGLVAGQVVDICSEGISDVGLEHLEFIHLHKTAALLEASVVLGAVLGGGTEEEVAKLRKFARNIGLLFQVVDDILDVTKSSHELGKTAGKDLVADKVTYPKLLGLQKSREFAEQLNKESQAQLSGFDQGKAAPLIALANYIAYREN
